# Supplementary material for: Modelling rainfall with a Bartlett-Lewis process: pyBL (v1.0.0), a Python software package and an application with short records
Source: Copernicus journal article supplement (doi:10.5194/egusphere-2024-1918), 2024-07-22
Supplement: Supplementary file [file egusphere-2024-1918-AC2-supplement.pdf]

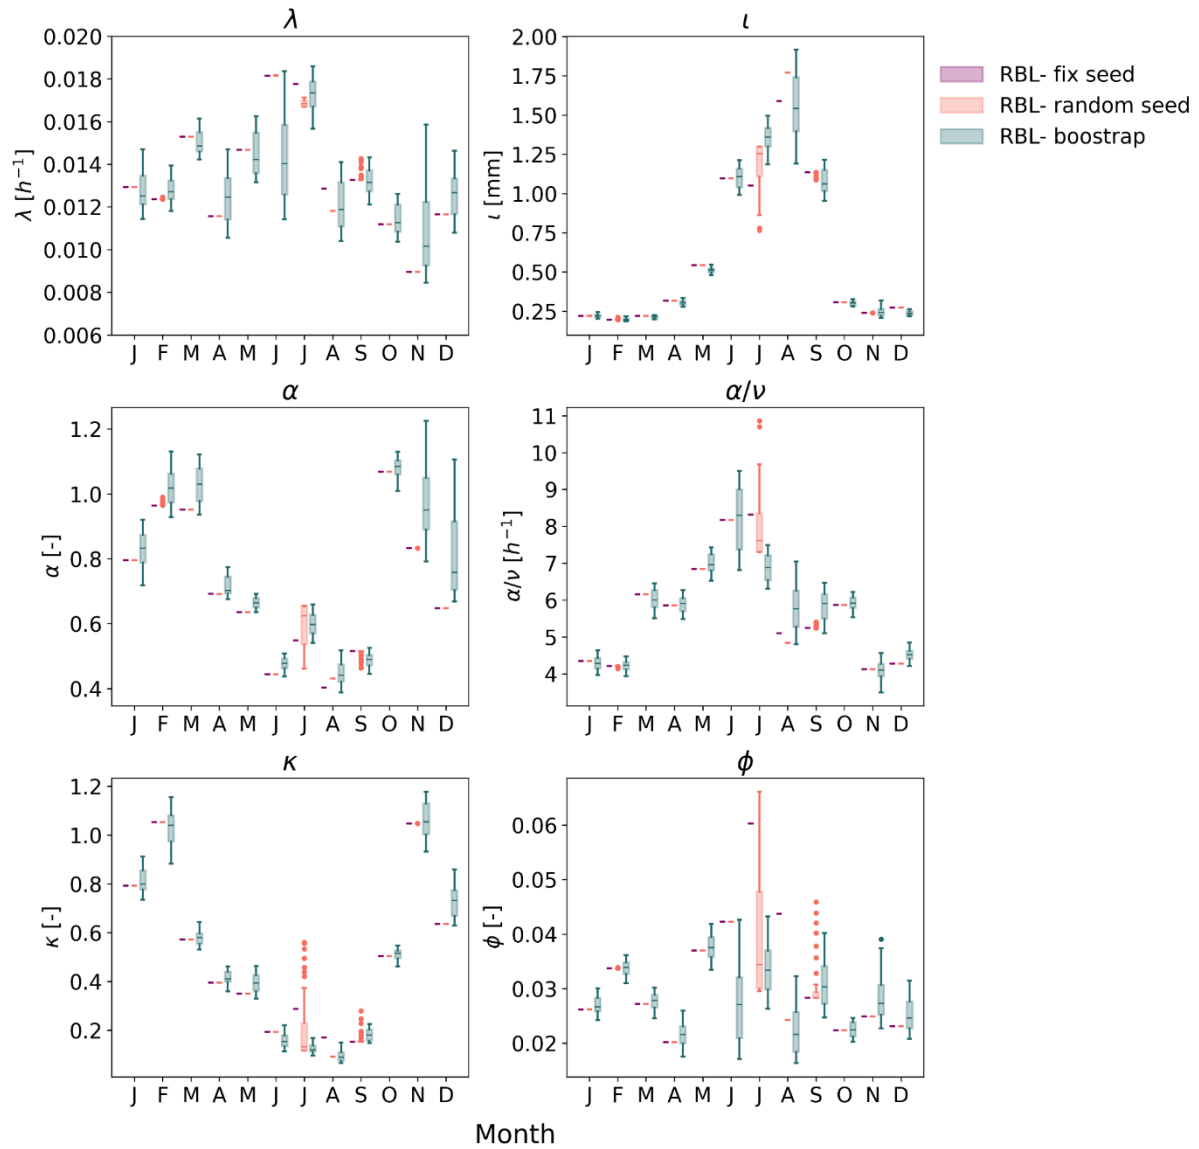

Figure 1. Variability of model parameters calibrated under three different scenarios: (1) fixed random seeds, (2) varying random seeds for initial guesses, and (3) the bootstrapping method.

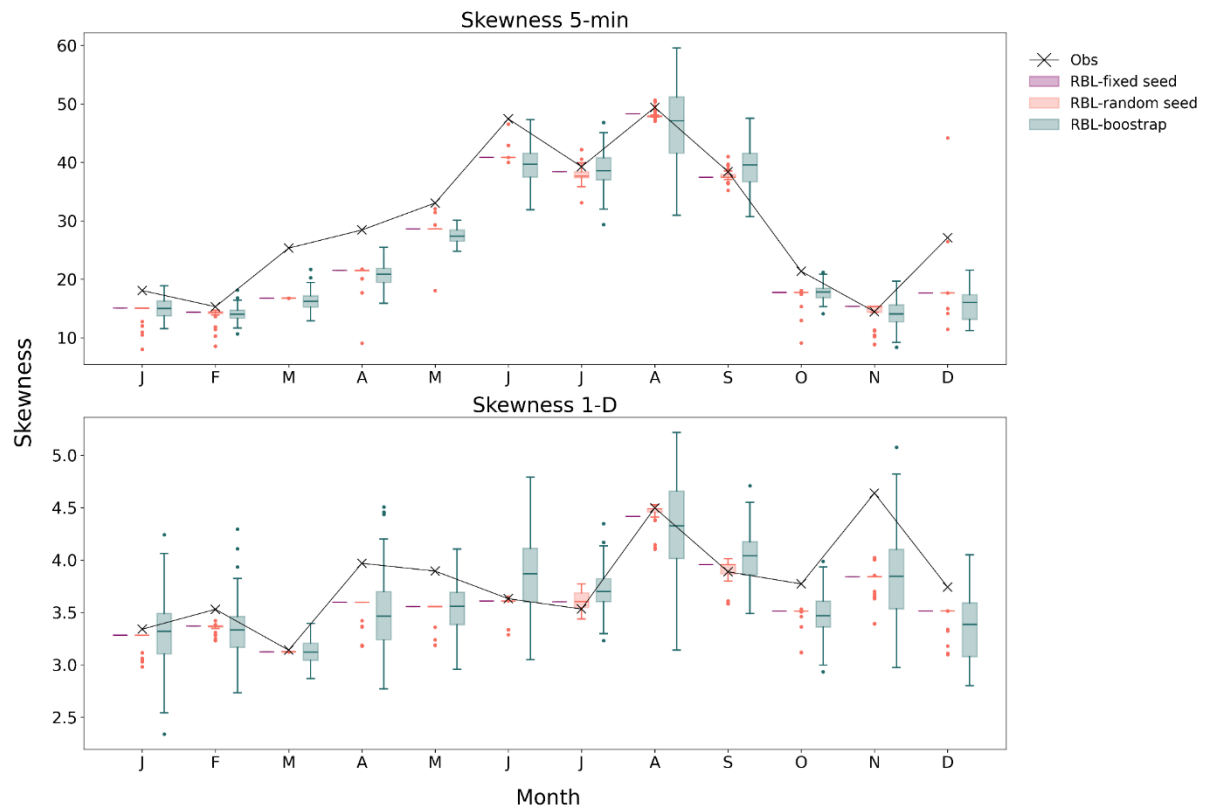

Figure 2. The corresponding 5-min and 1-day skewness estimates computed using the model parameters shown in Fig. 1.
